# Supplementary material for: Effect of Capping Ligands for the Synthesis of Gold Nanoparticles and on the Catalytic Performance for the Oxidation of 5-Hydroxymethyl-2-furfural
Source: MDPI journal article supplement (doi:10.3390/catal13060990), 2023-06-09
Supplement: s1 [file s1]

# Effect of Capping Ligands for the Synthesis of Gold Nanoparticles and on the Catalytic Performance for the Oxidation of 5-Hydroxymethyl-2-furfural

Francesca Liuzzi <sup>1,2</sup>, Alessia Ventimiglia <sup>1,2</sup>, Alessandro Allegri <sup>1,2</sup>, Elena Rodríguez-Aguado <sup>3</sup>, Juan Antonio Cecilia <sup>3</sup>, Ivan Rivalta <sup>1,2,4</sup>, Nikolaos Dimitratos <sup>1,2,\*</sup> and Stefania Albonetti <sup>1,2,\*</sup>

<sup>1</sup> Industrial Chemistry "Toso Montanari" Department, University of Bologna, Viale Risorgimento 4, 40136 Bologna, Italy; francesca.liuzzi7@unibo.it (F.L.); alessia.ventimiglia3@unibo.it (A.V.); alessandro.allegri2@unibo.it (A.A.); i.rivalta@unibo.it (I.R.)

<sup>2</sup> Center for Chemical Catalysis-C3, Alma Mater Studiorum Università di Bologna, Viale Risorgimento 4, 40136 Bologna, Italy

<sup>3</sup> Departamento de Química Inorgánica, Cristalografía y Mineralogía, Facultad de Ciencias, Universidad de Málaga, Campus de Teatinos, 29071 Málaga, Spain; aguadoelena5@gmail.com (E.R.-A.); jacecilia@uma.es (J.A.C.)

<sup>4</sup> Laboratoire de Chimie UMR 5182, ENSL, CNRS, 46 allée d'Italie, 69364 Lyon, France

\* Correspondence: nikolaos.dimitratos@unibo.it (N.D.); stefania.albonetti@unibo.it (S.A.)

## Supporting Information

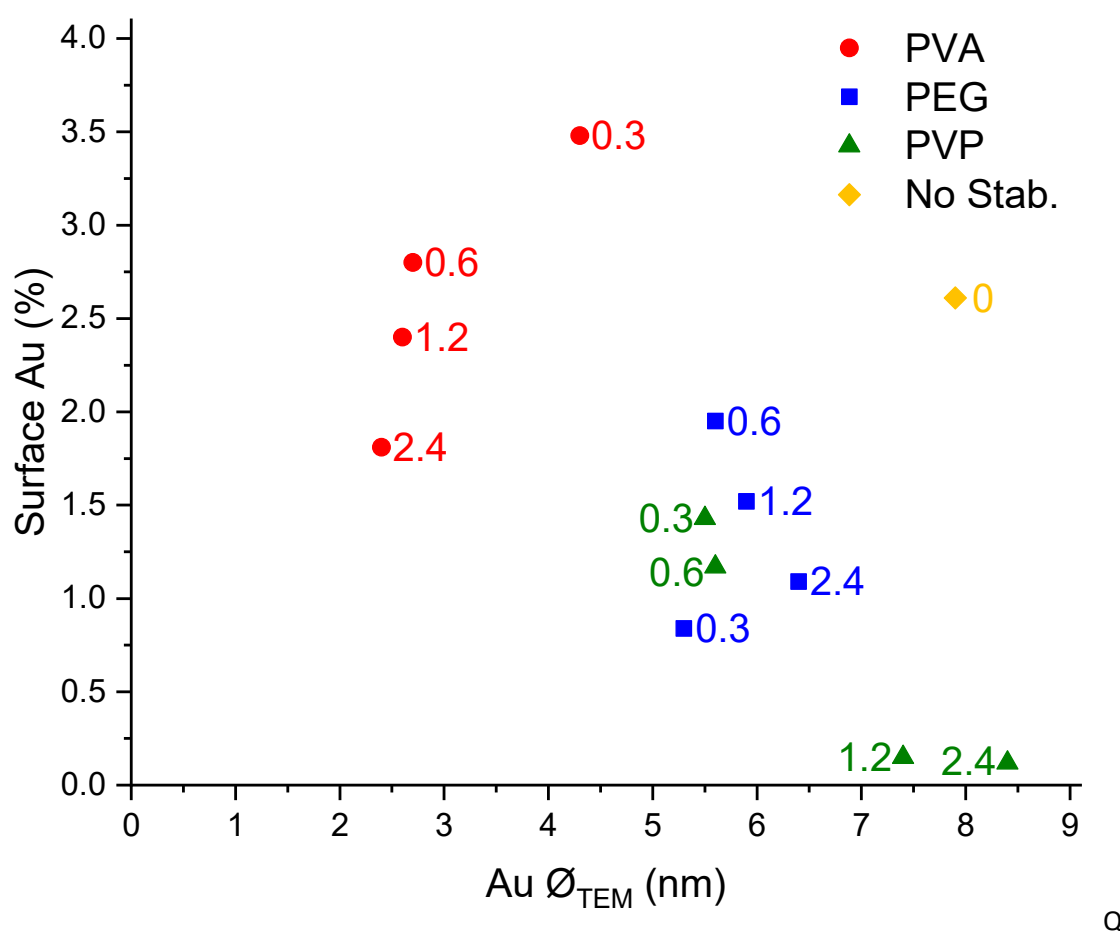

**Figure S1.** Correlation between mean particle size measured by TEM and percentage of Au on surface (XPS analysis).

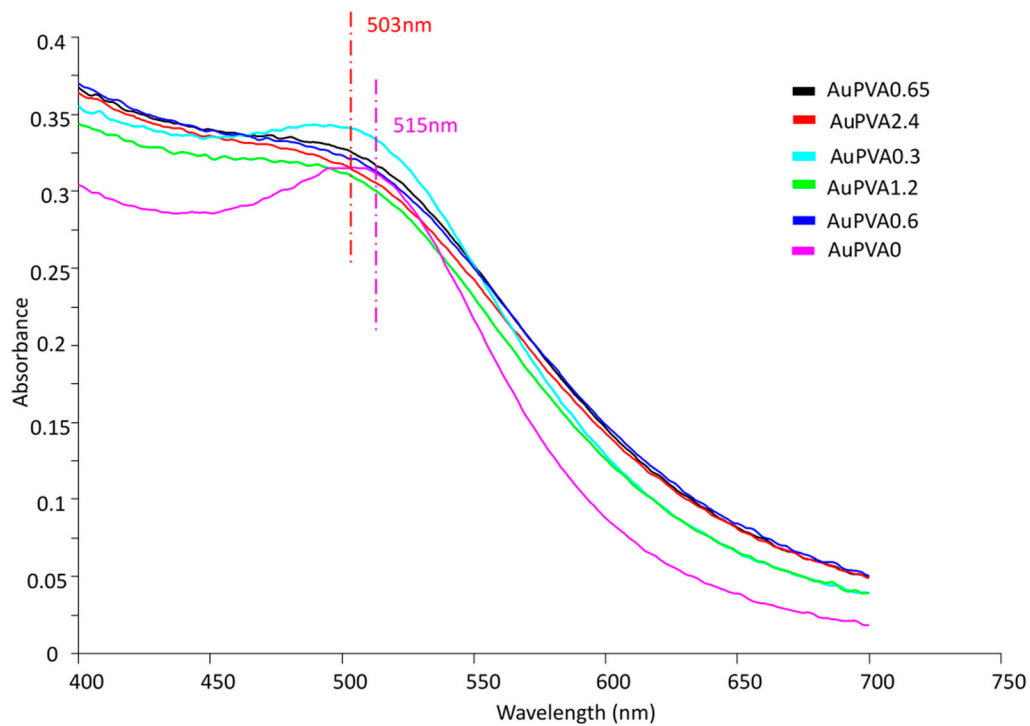

**Figure S2.** UV-Vis spectra of Au NPs colloidal suspension with varying amounts of PVA as stabilizer.

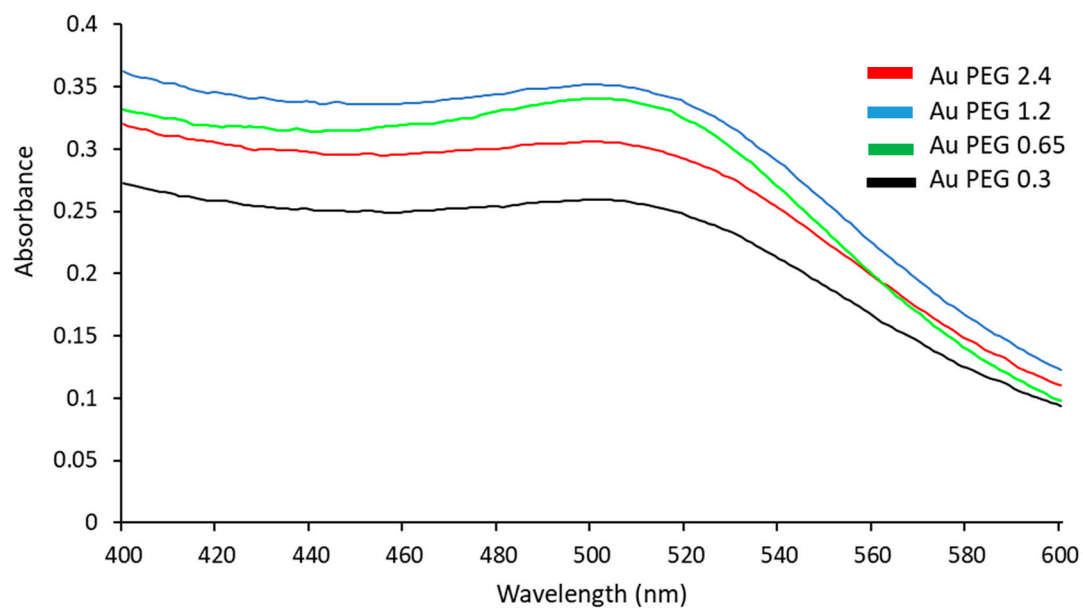

**Figure S3.** UV-Vis spectra of Au NPs colloidal suspension with varying amounts of PEG as stabilizer.

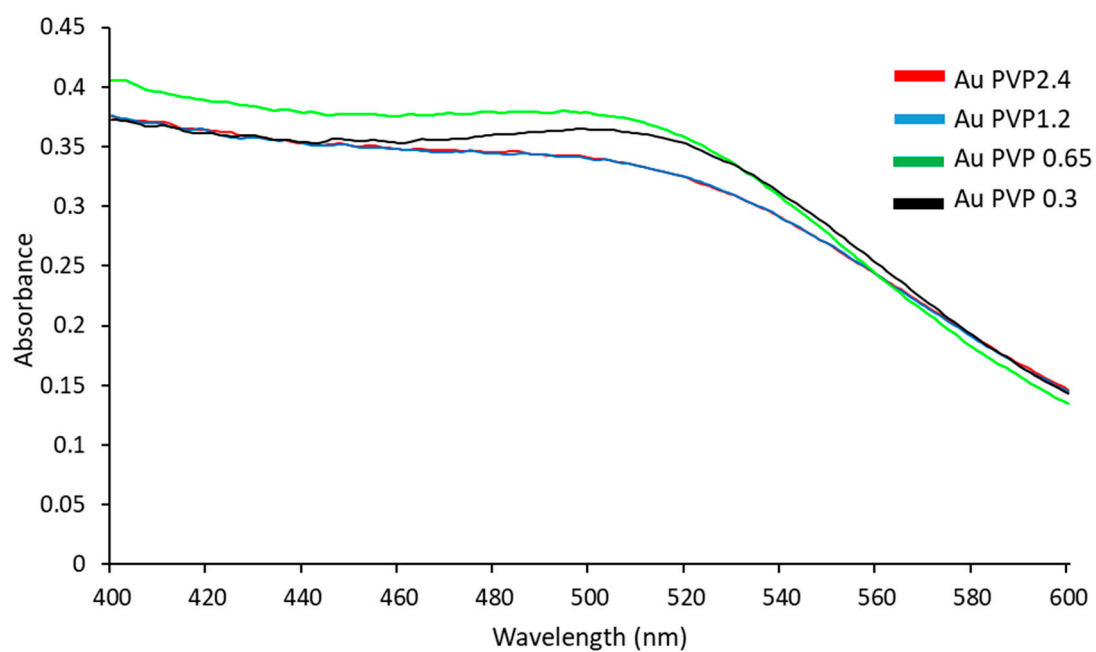

**Figure S4.** UV-Vis spectra of Au NPs colloidal suspension with varying amounts of PVP as stabilizer.

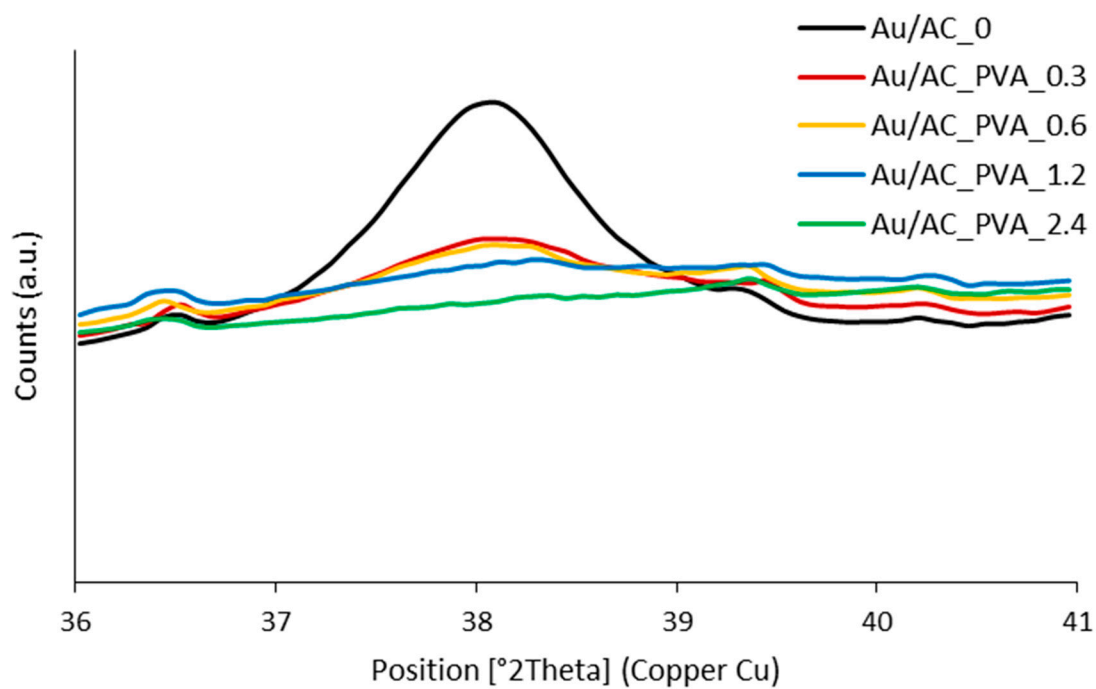

**Figure S5.** XRD patterns of Au/AC samples with different PVA:Cu weight ratio.

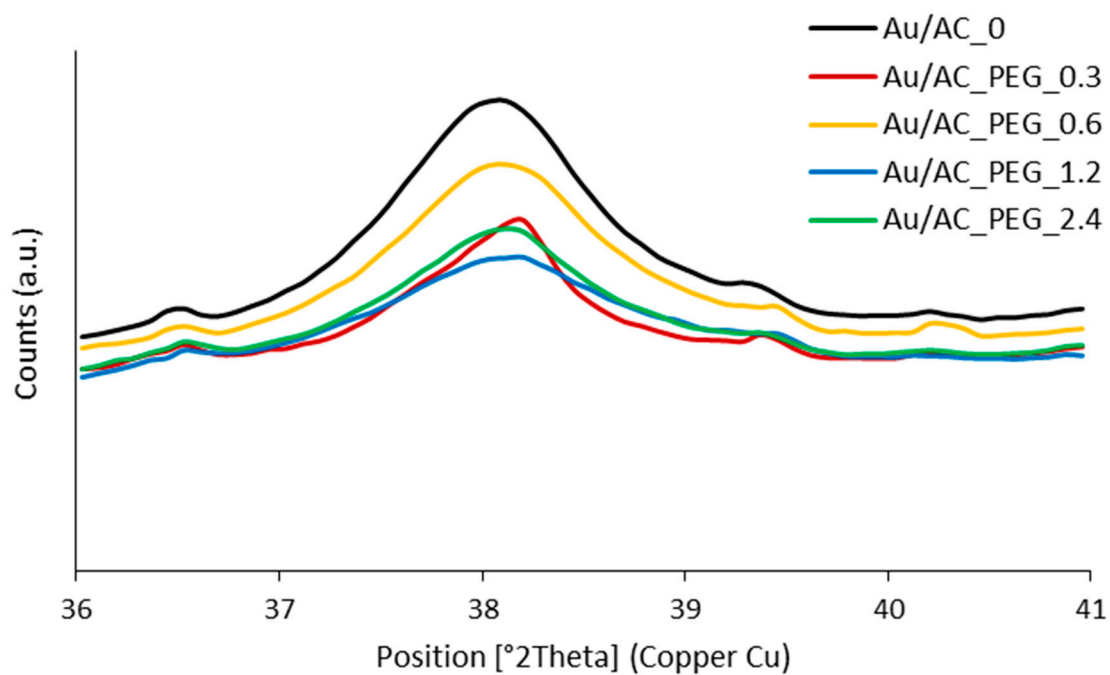

**Figure S6.** XRD patterns of Au/AC samples with different PEG: Au weight ratio.

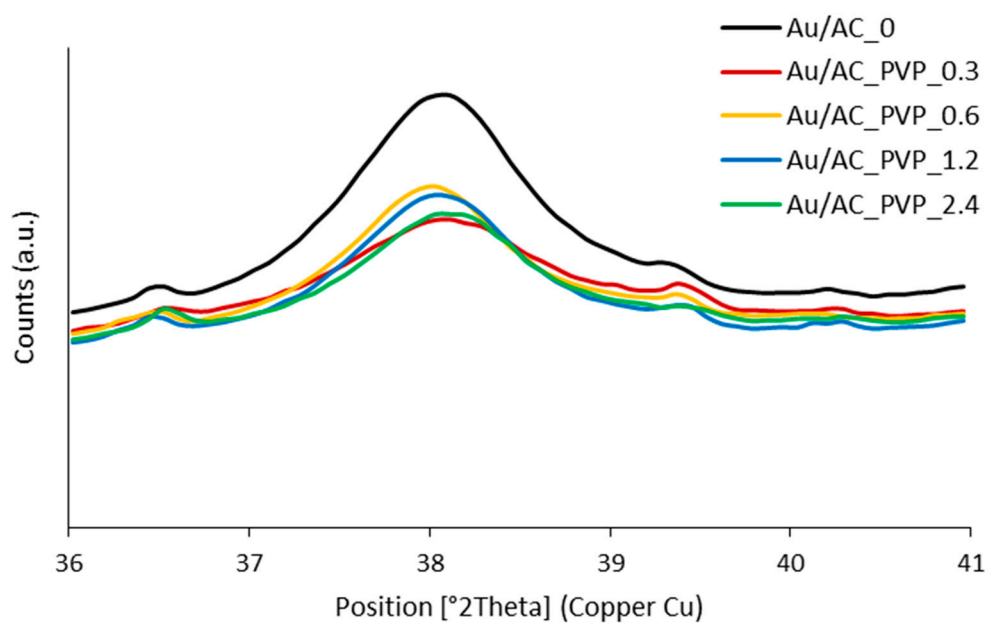

**Figure S7.** XRD patterns of Au/AC samples with different PVP: Au weight ratio.

**Table S1.** Mean crystallite size for Au/AC samples calculated from XRD analysis.

| <b>Sample</b>        | <b>Employed polymer</b> | <b>Polymer: Au weight ratio</b> | <b>Au NPs XRD diameter (nm)</b> |
|----------------------|-------------------------|---------------------------------|---------------------------------|
| <i>Au/AC_0</i>       | None                    | 0                               | 6                               |
| <i>Au/AC_PVA_0.3</i> | PVA                     | 0.3                             | 4                               |
| <i>Au/AC_PVA_0.6</i> | PVA                     | 0.6                             | 3                               |
| <i>Au/AC_PVA_1.2</i> | PVA                     | 1.2                             | 3                               |
| <i>Au/AC_PVA_2.4</i> | PVA                     | 2.4                             | 2                               |
| <i>Au/AC_PEG_0.3</i> | PEG                     | 0.3                             | 10                              |
| <i>Au/AC_PEG_0.6</i> | PEG                     | 0.6                             | 6                               |
| <i>Au/AC_PEG_1.2</i> | PEG                     | 1.2                             | 6                               |
| <i>Au/AC_PEG_2.4</i> | PEG                     | 2.4                             | 7                               |
| <i>Au/AC_PVP_0.3</i> | PVP                     | 0.3                             | 7                               |
| <i>Au/AC_PVP_0.6</i> | PVP                     | 0.6                             | 6                               |
| <i>Au/AC_PVP_1.2</i> | PVP                     | 1.2                             | 8                               |
| <i>Au/AC_PVP_2.4</i> | PVP                     | 2.4                             | 8                               |

**Table S2.** XPS Analysis for the synthesised catalysts.

| <b>Samples</b>       | <b>BE Gold [eV]</b> | <b>Au on surface [at%]</b> | <b>C on surface [at%]</b> | <b>N on surface [at%]</b> | <b>Surface atomic ratio Au/C</b> |
|----------------------|---------------------|----------------------------|---------------------------|---------------------------|----------------------------------|
| <i>Au/AC_0</i>       | 84                  | 2.61                       | 91.64                     | -                         | 0.028                            |
| <i>Au/AC_PVA_0.3</i> | 84.1                | 3.48                       | 87.52                     | -                         | 0.039                            |
| <i>Au/AC_PVA_0.6</i> | 84.1                | 2.8                        | 85.8                      | -                         | 0.033                            |
| <i>Au/AC_PVA_1.2</i> | 84.1                | 2.4                        | 82.55                     | -                         | 0.029                            |
| <i>Au/AC_PVA_2.4</i> | 84.1                | 1.81                       | 82.53                     | -                         | 0.022                            |
| <i>Au/AC_PVP_0.3</i> | 84                  | 1.43                       | 90.94                     | 2.1                       | 0.016                            |
| <i>Au/AC_PVP_0.6</i> | 84                  | 1.17                       | 88.69                     | 3.25                      | 0.013                            |
| <i>Au/AC_PVP_1.2</i> | 84                  | 0.15                       | 90.81                     | 2.9                       | 0.0016                           |
| <i>Au/AC_PVP_2.4</i> | 84.1                | 0.12                       | 89.53                     | 3.6                       | 0.0013                           |
| <i>Au/AC_PEG_0.3</i> | 84.1                | 0.84                       | 94.35                     | -                         | 0.009                            |
| <i>Au/AC_PEG_0.6</i> | 84.1                | 1.95                       | 92.48                     | -                         | 0.021                            |
| <i>Au/AC_PEG_1.2</i> | 84.1                | 1.52                       | 93.36                     | -                         | 0.016                            |
| <i>Au/AC_PEG_2.4</i> | 84.1                | 1.09                       | 93.64                     | -                         | 0.012                            |

**Table S3.** XPS analysis on spent catalysts (after 3 uses).

| Samples                        | BE<br>Gold<br>[eV] | Au on surface [at%] | C on<br>surface<br>[at%] | N on<br>surface<br>[at%] | Surface<br>atomic ratio<br>Au/C |
|--------------------------------|--------------------|---------------------|--------------------------|--------------------------|---------------------------------|
| <i>Au/AC_PVP_0.6</i><br>3 uses | 84                 | 0.25                | 88.44                    | 2.21                     | 0.003                           |
| <i>Au/AC_PEG_0.6</i><br>3 uses | 84                 | 0.68                | 88.52                    | 0.5                      | 0.008                           |
| <i>Au/AC_PEG_2.4</i><br>3 uses | 83.9               | 0.71                | 88.09                    | 0.57                     | 0.0008                          |
| <i>Au/AC_PVA_0.6</i><br>3 uses | 83.9               | 0.18                | 86.09                    | 0.39                     | 0.002                           |
| <i>Au/AC_PVA_2.4</i><br>3 uses | 83.9               | 0.24                | 88.87                    | -                        | 0.003                           |

• **Au/AC\_PVP\_0.6**

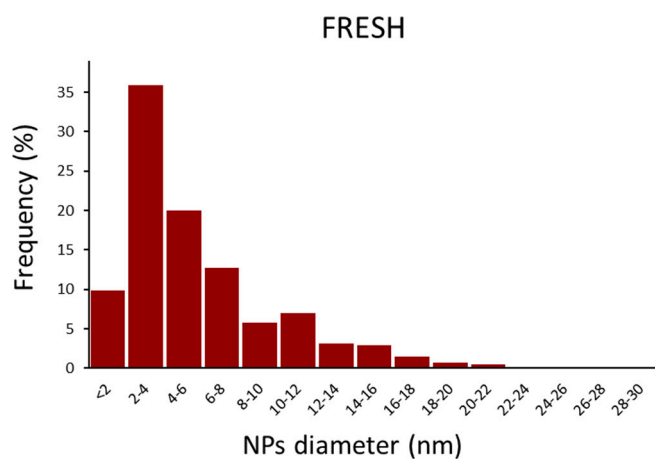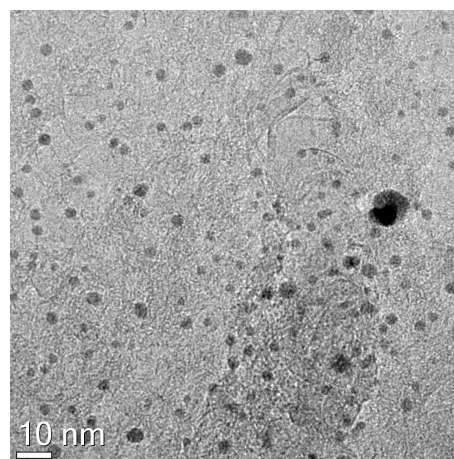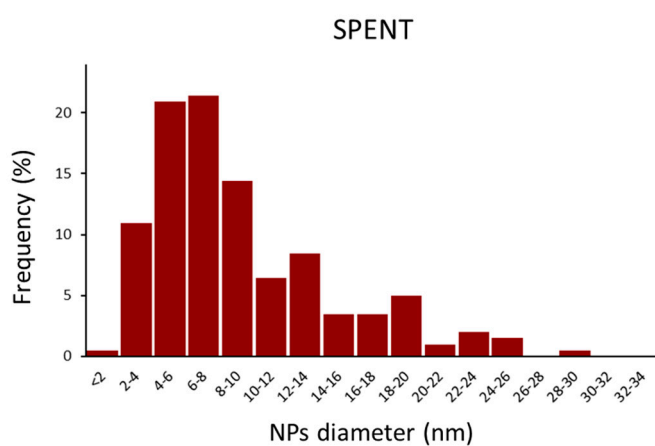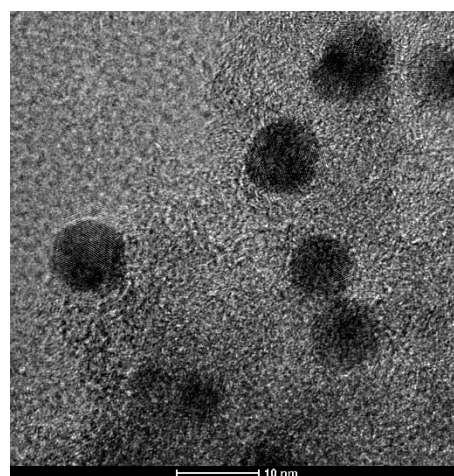

**Figure S8.** TEM images and particle size distributions of Au/AC\_PVP\_0.6 catalyst before and after two reaction cycles .

- **Au/AC\_PEG\_0.6**

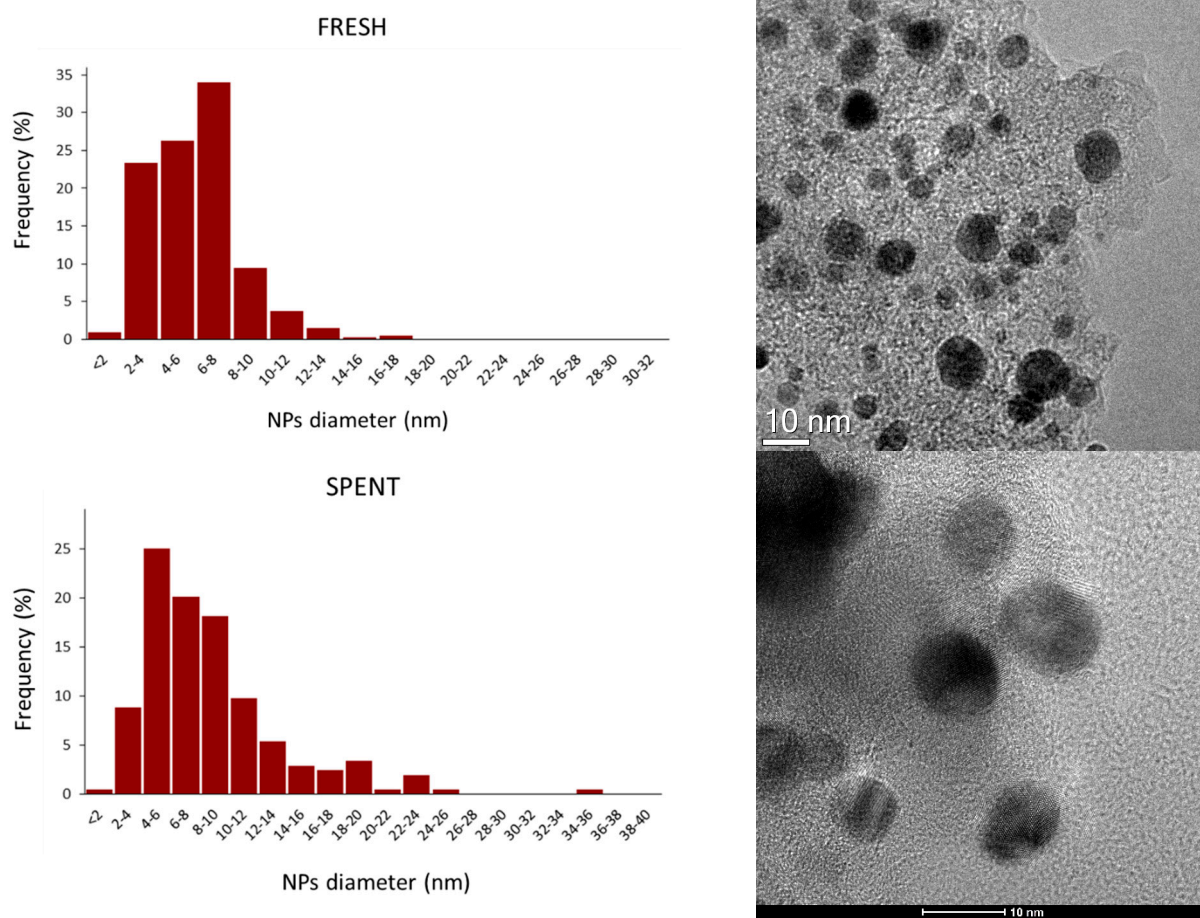

**Figure S9.** TEM images and particle size distributions of Au/AC\_PEG\_0.6 catalyst before and after three reaction cycles.



- Au/AC\_PEG\_2.4

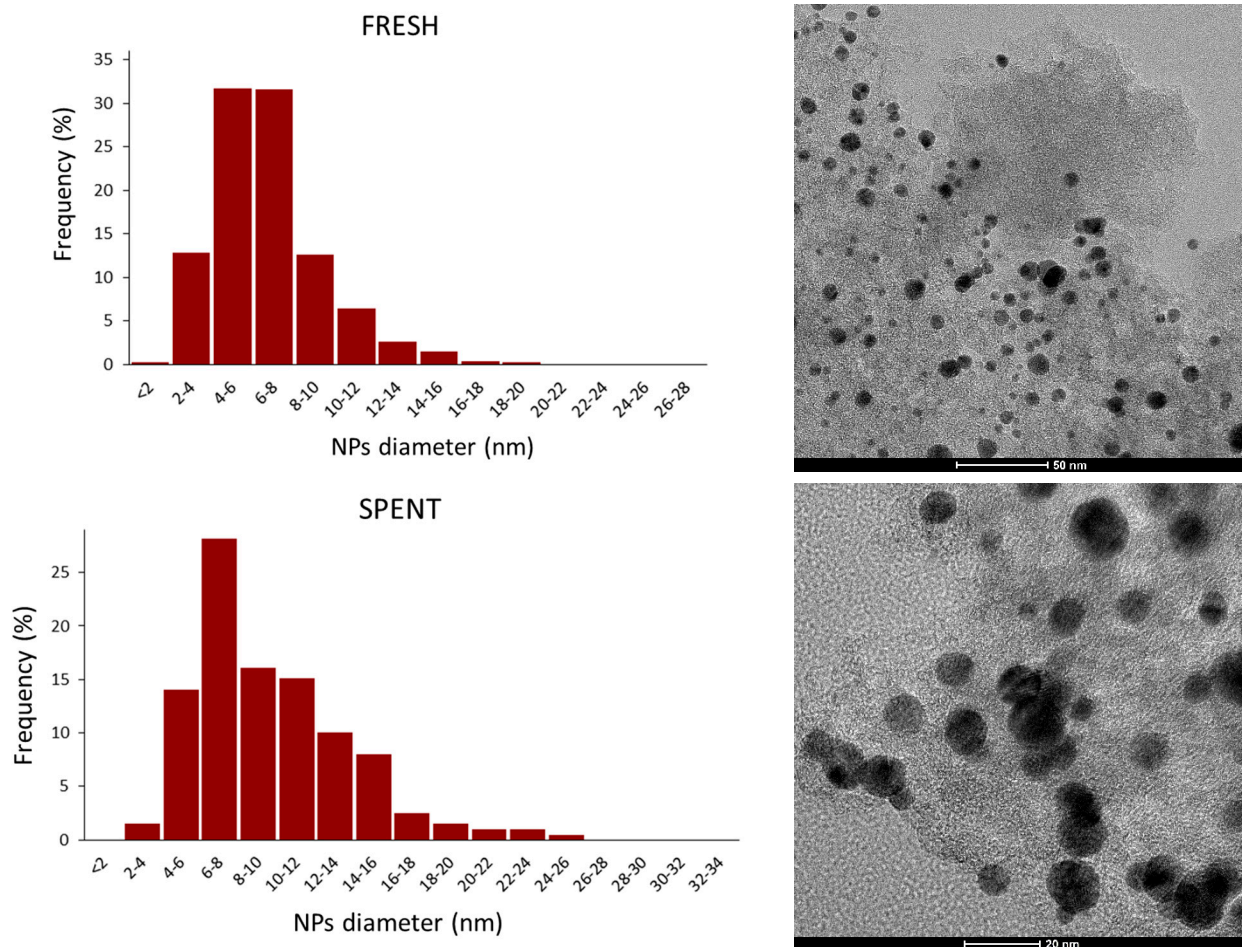

**Figure S10.** TEM images and particle size distributions of Au/AC\_PEG\_2.4 catalyst before and after three reaction cycles.



- **Au/AC\_PVA\_0.6**

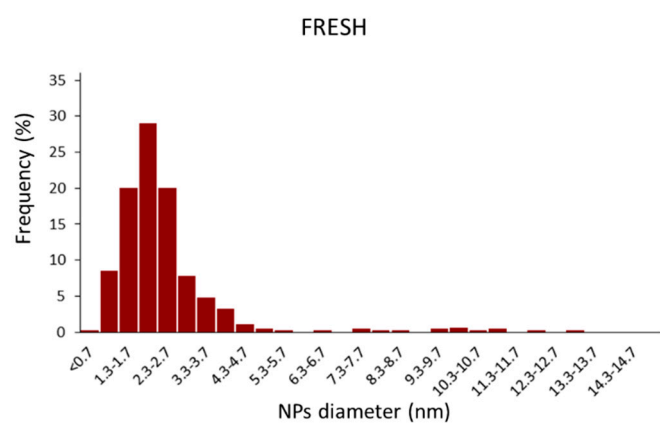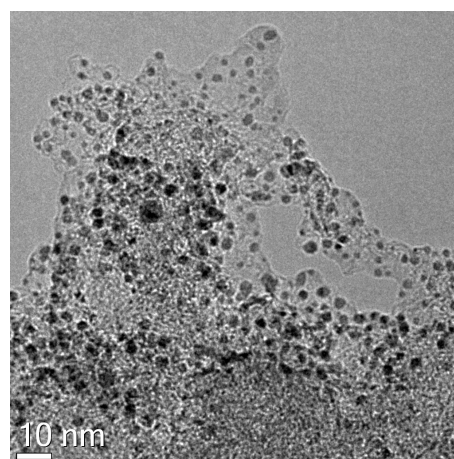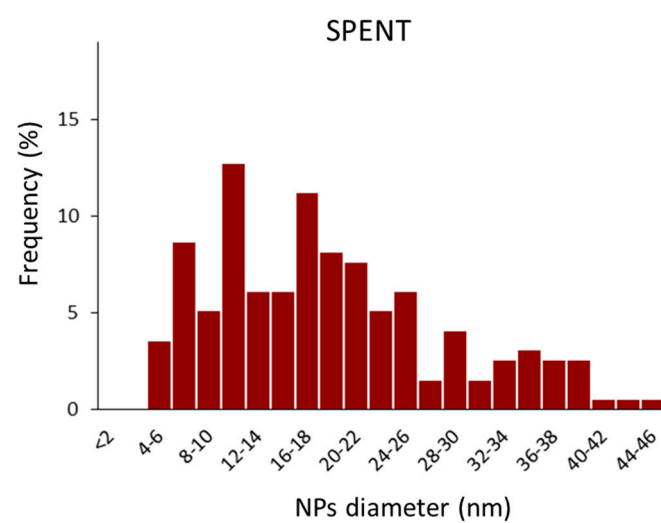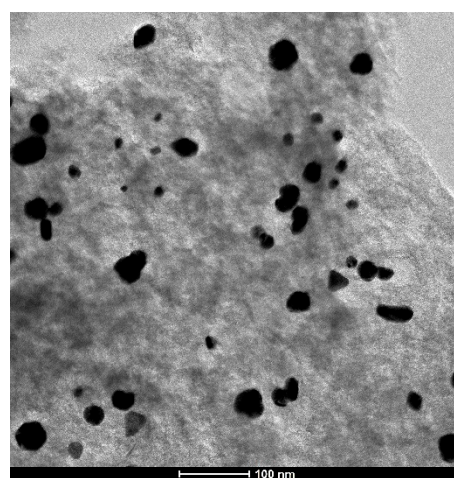

**Figure S11.** TEM images and particle size distributions of Au/AC\_PVA\_0.6 catalyst before and after three reaction cycles.

- **Au/AC\_PVA\_2.4**

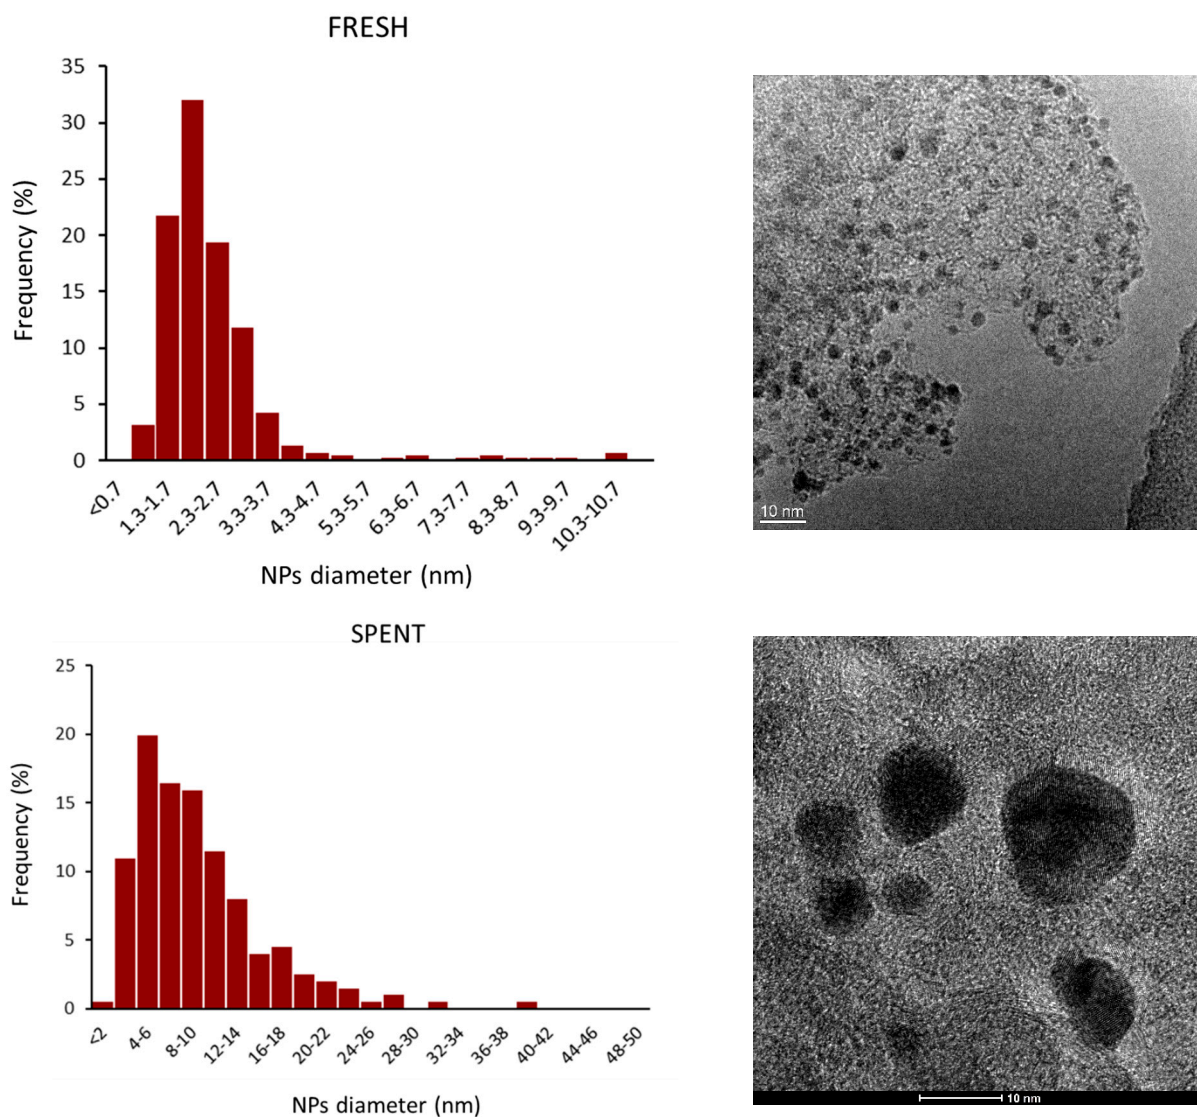

**Figure S12.** TEM images and particle size distributions of Au/AC\_PVA\_2.4 catalyst before and after three reaction cycles.

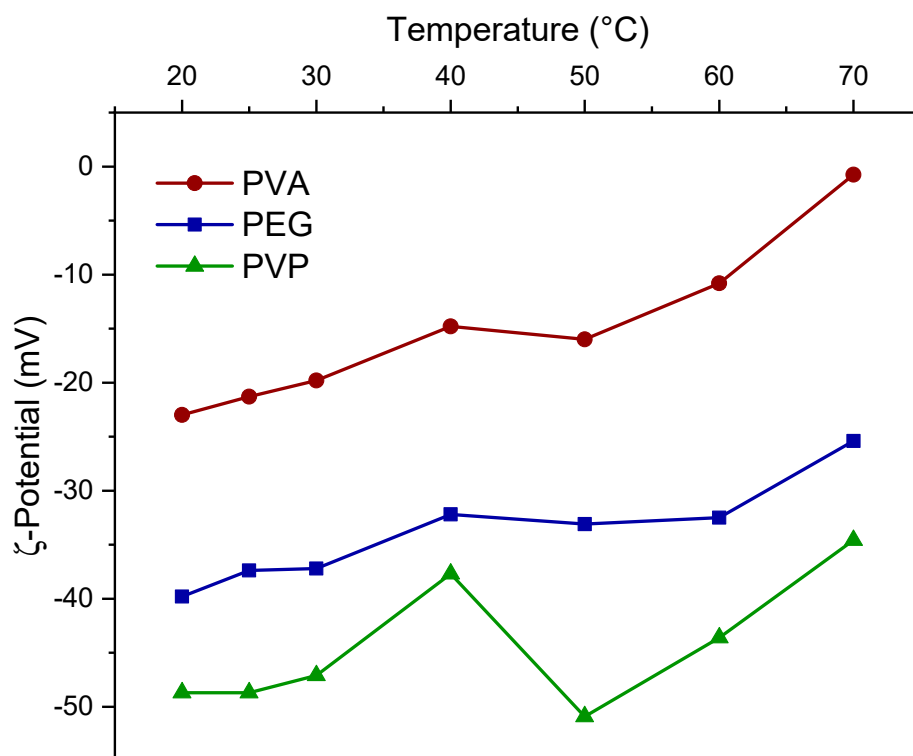

**Figure S13.** Temperature effect on zeta potential for the Au colloidal suspension stabilized with different polymers (PVA, PEG, PVP). Polymer: Au weight ratio of 0.6.

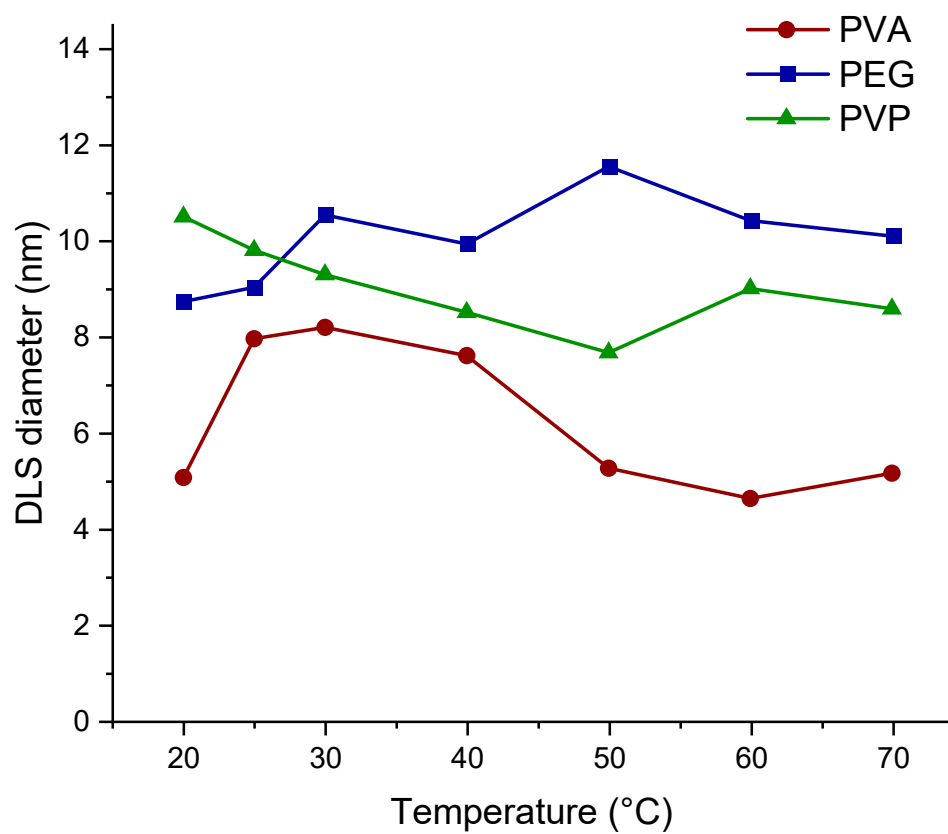

**Figure S14.** Temperature effect on DLS diameter for the Au colloidal suspension stabilized with different polymers (PVA, PEG, PVP). Polymer: Au weight ratio of 0.6.

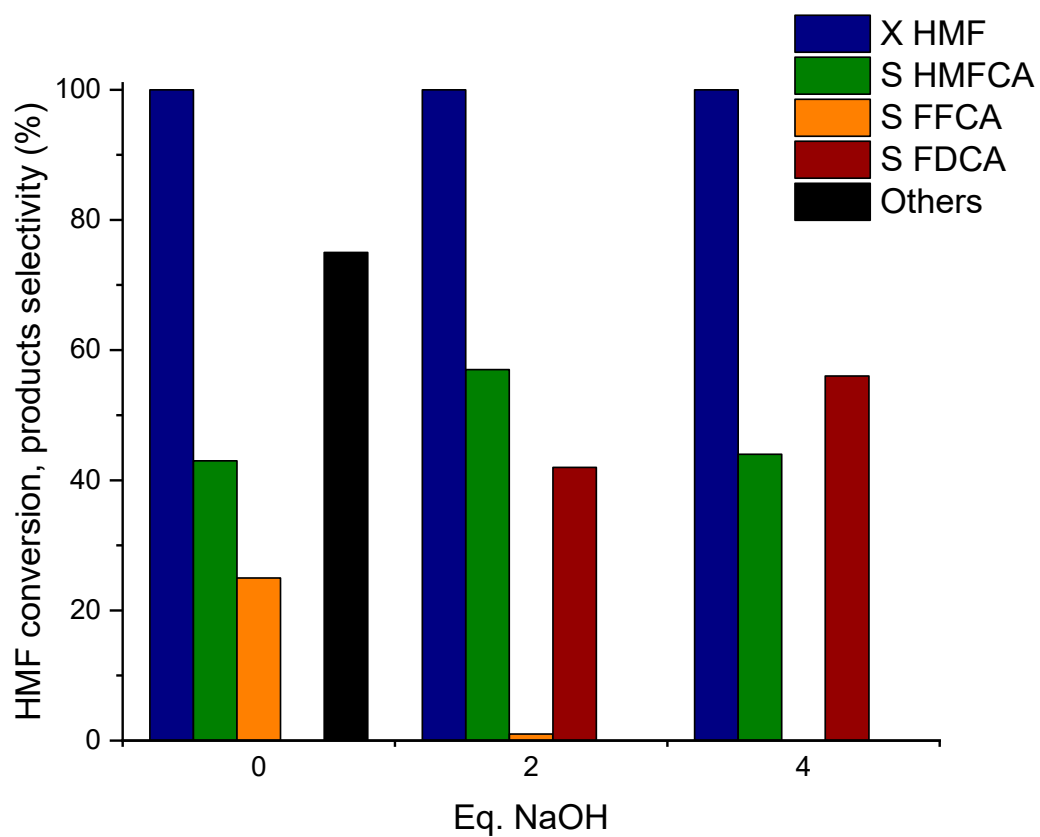

**Figure S15.** Effect of the NaOH equivalent on the sample Au/AC\_PVA\_0.6. Reaction conditions: 2 h, 70 °C, 10 bar O<sub>2</sub>, HMF:Met:NaOH=1:0.01:4.

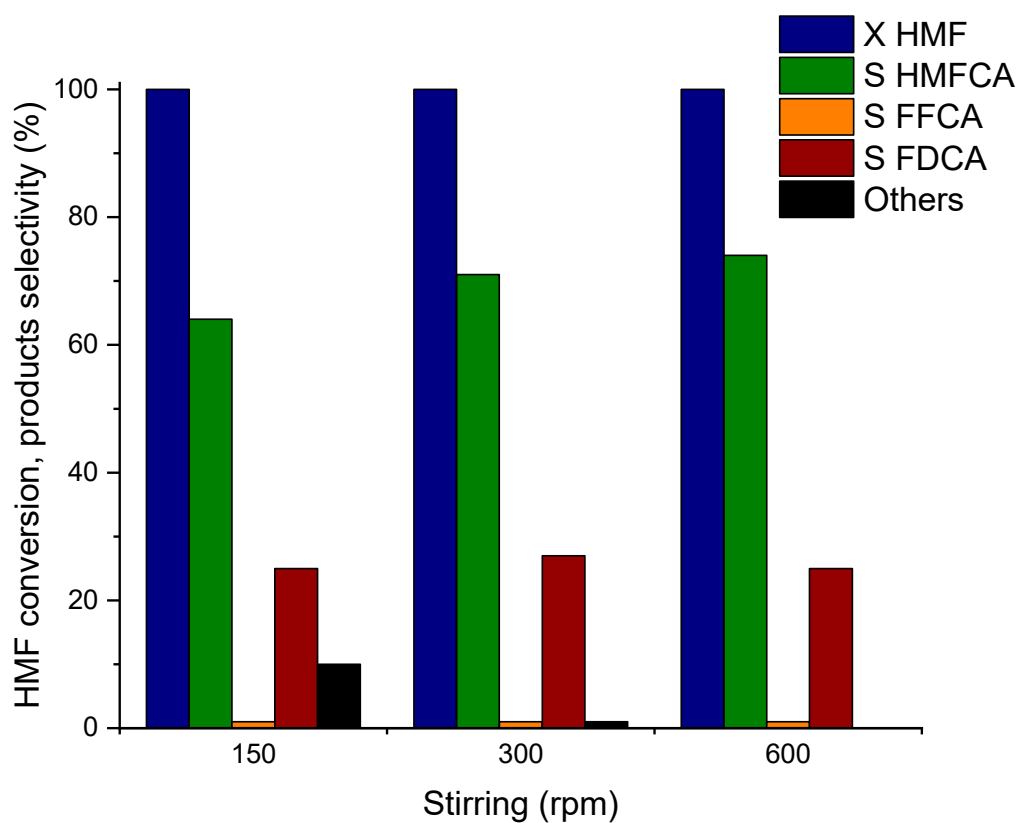

**Figure S16.** Effect of the stirring rate on the sample Au/AC\_PVA\_0.6. Reaction conditions: 1 h, 70 °C, 10 bar O<sub>2</sub>, HMF:Met:NaOH=1:0.01:4.

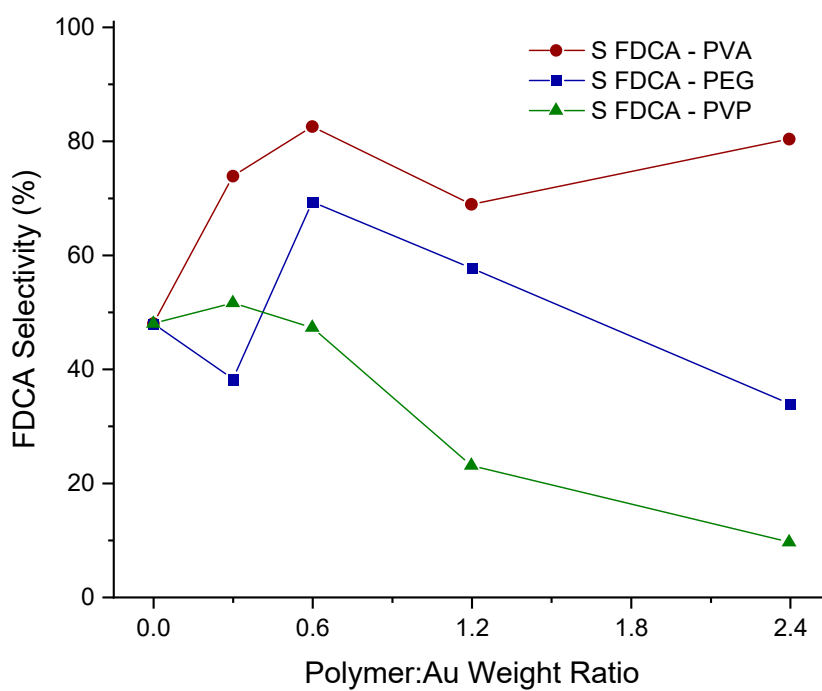

**Figure S17.** Correlation between catalytic performances and stabilizer to Au weight ratio for each catalyst series. Reaction conditions: 70 °C, 4 h, 10 bar O<sub>2</sub>, HMF:Met:NaOH=1:0.01:4.



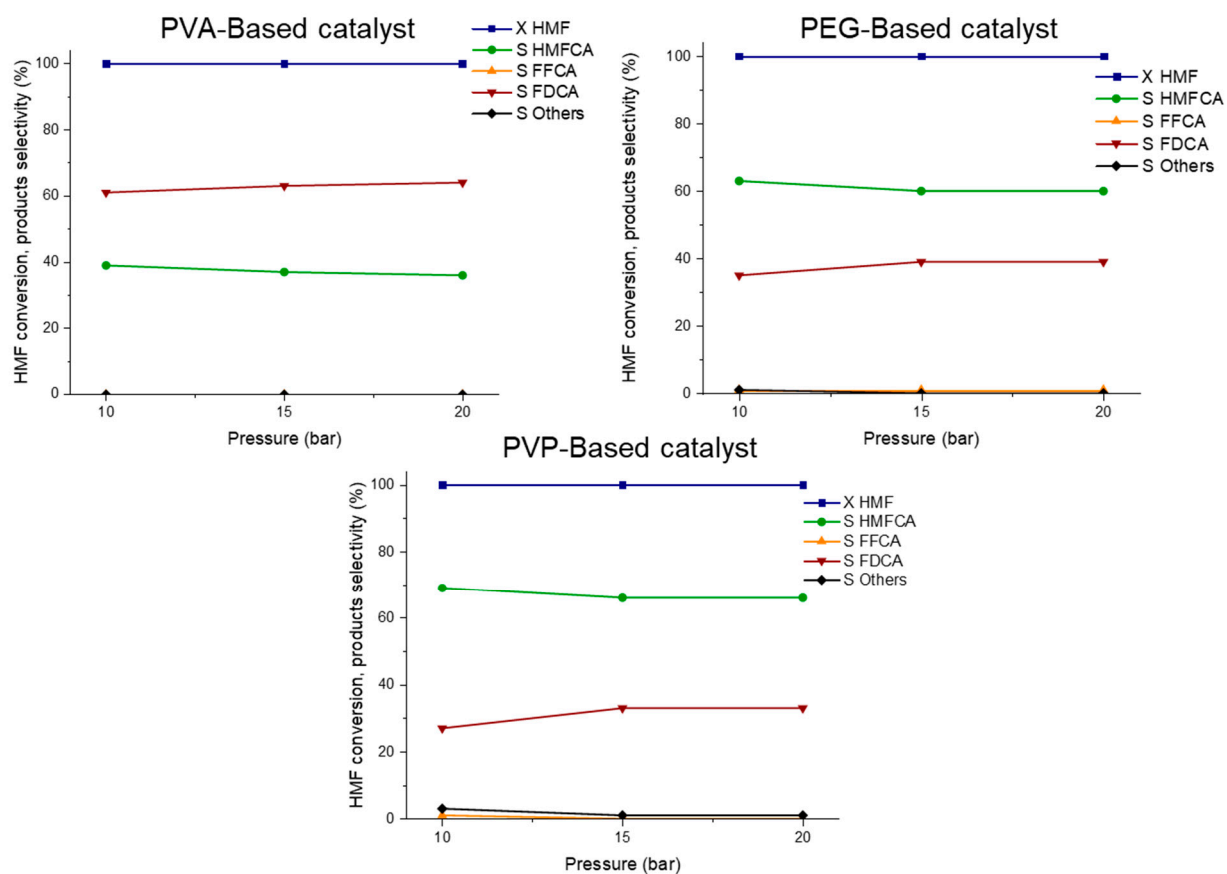

**Figure S18.** Effect of the oxygen pressure on the 0.6 Polymer: Au weight ratio catalysts. Reaction conditions: 2 h, 70 °C, HMF:Met:NaOH=1:0.01:4.

• **Au/AC\_PEG\_0.6**

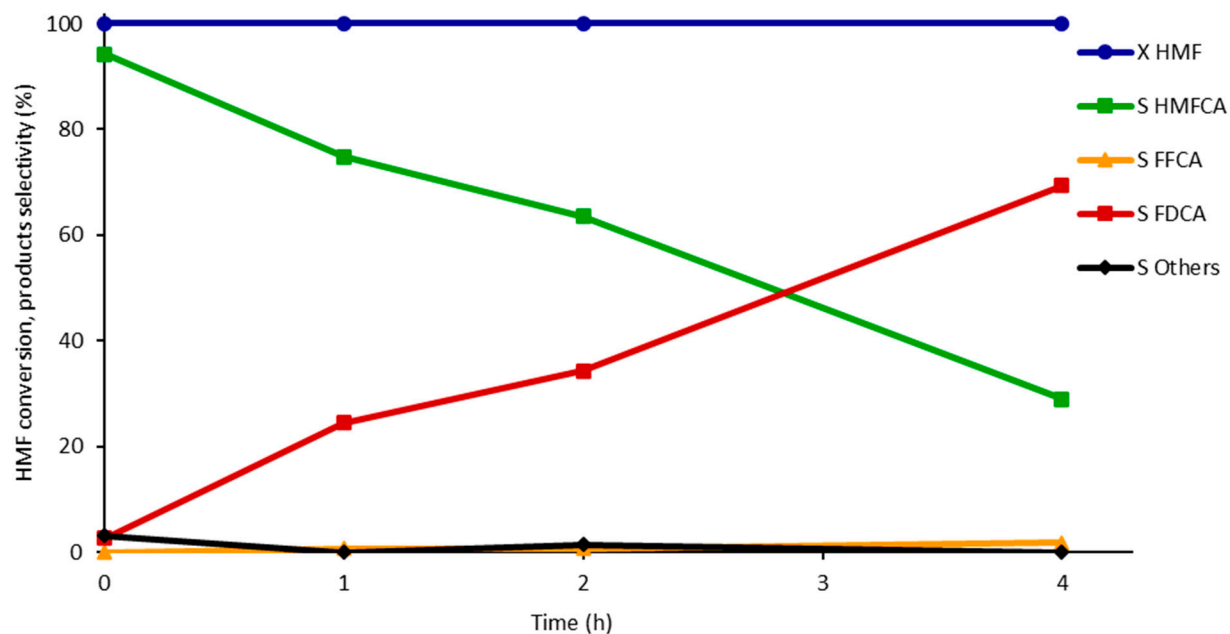

**Figure S19.** Study on the reaction time. Catalyst: Au/AC\_PEG\_0.6. Reaction conditions: 70 °C, 10 bar O<sub>2</sub>, HMF:Met:NaOH=1:0.01:4.

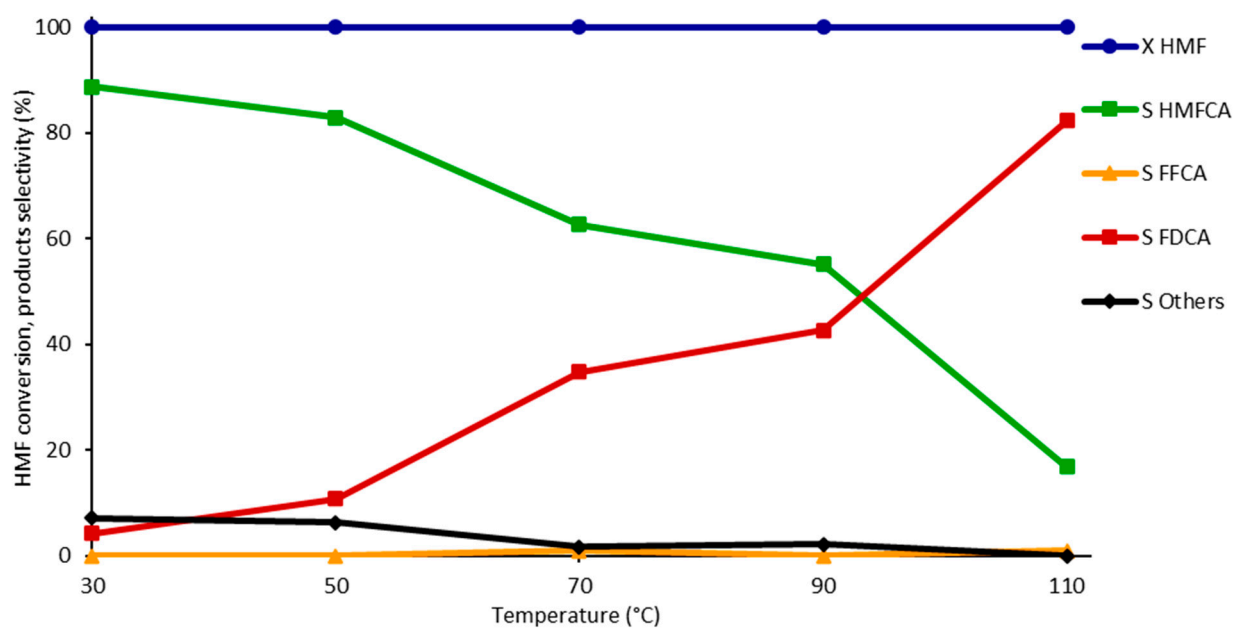

**Figure S20.** Study on the reaction temperature. Catalyst: Au/AC\_PEG\_0.6. Reaction conditions: 2 h, 10 bar O<sub>2</sub>, HMF:Met:NaOH=1:0.01:4.

• **Au/AC\_PVP\_0.6**

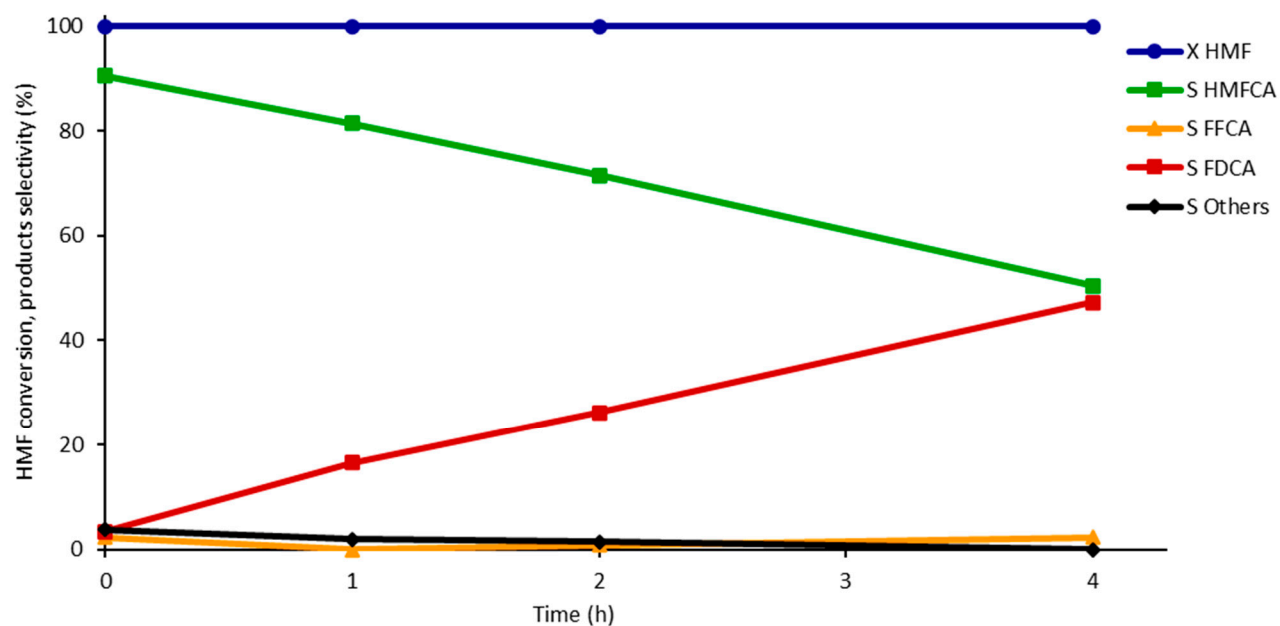

**Figure S21.** Study on the reaction time. Catalyst: Au/AC\_PVP\_0.6. Reaction conditions: 70 °C, 10 bar O<sub>2</sub>, HMF:Met:NaOH=1:0.01:4.

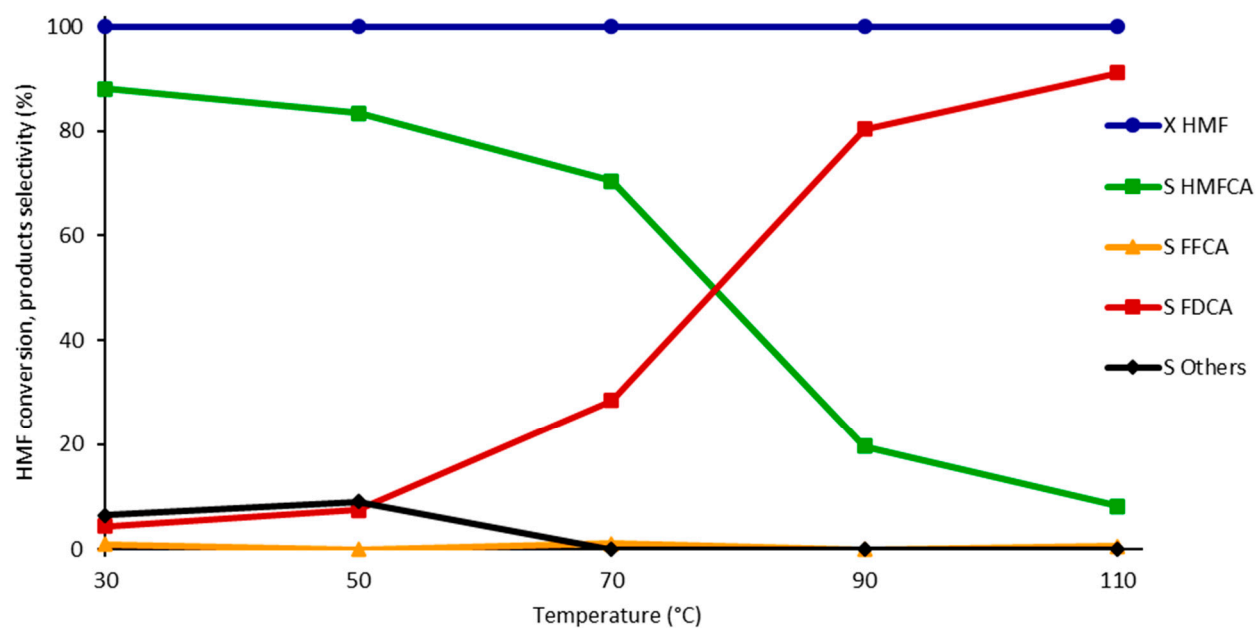

**Figure S22.** Study on the reaction temperature. Catalyst: Au/AC\_PVP\_0.6. Reaction conditions: 2 h, 10 bar O<sub>2</sub>, HMF:Met:NaOH=1:0.01:4.

• **Au/AC\_PVA\_0.6**

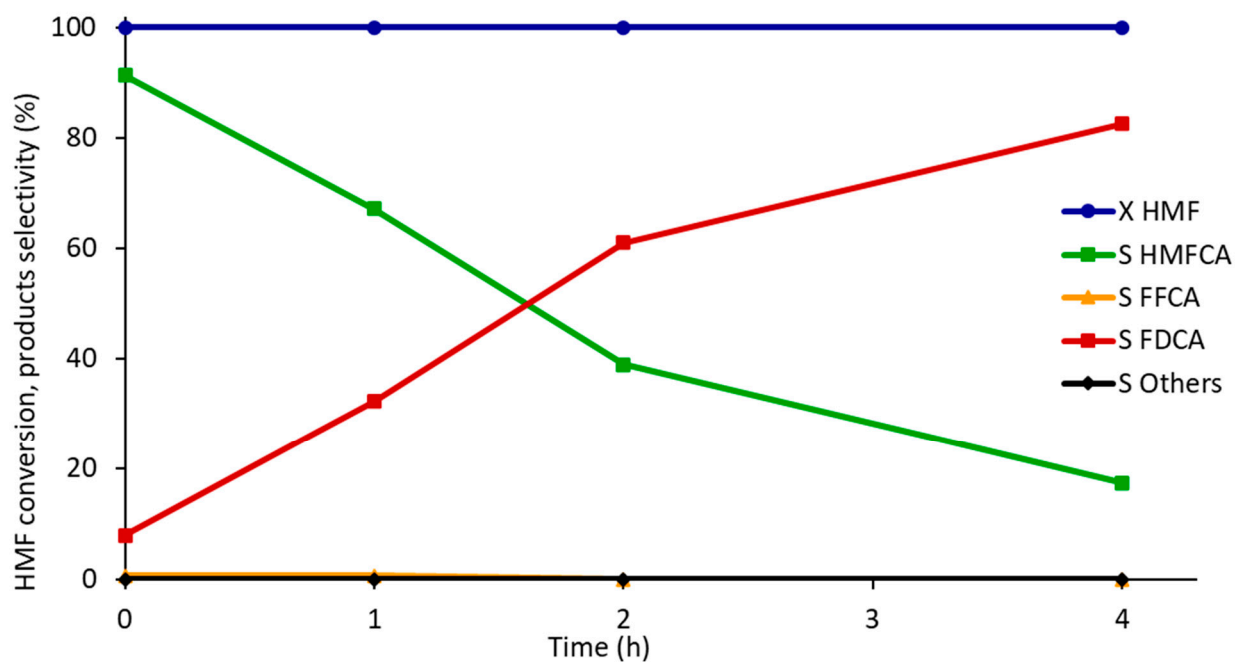

**Figure S23.** Study on the reaction time. Catalyst: Au/AC\_PVA\_0.6. Reaction conditions: 70 °C, 10 bar O<sub>2</sub>, HMF:Met:NaOH=1:0.01:4.

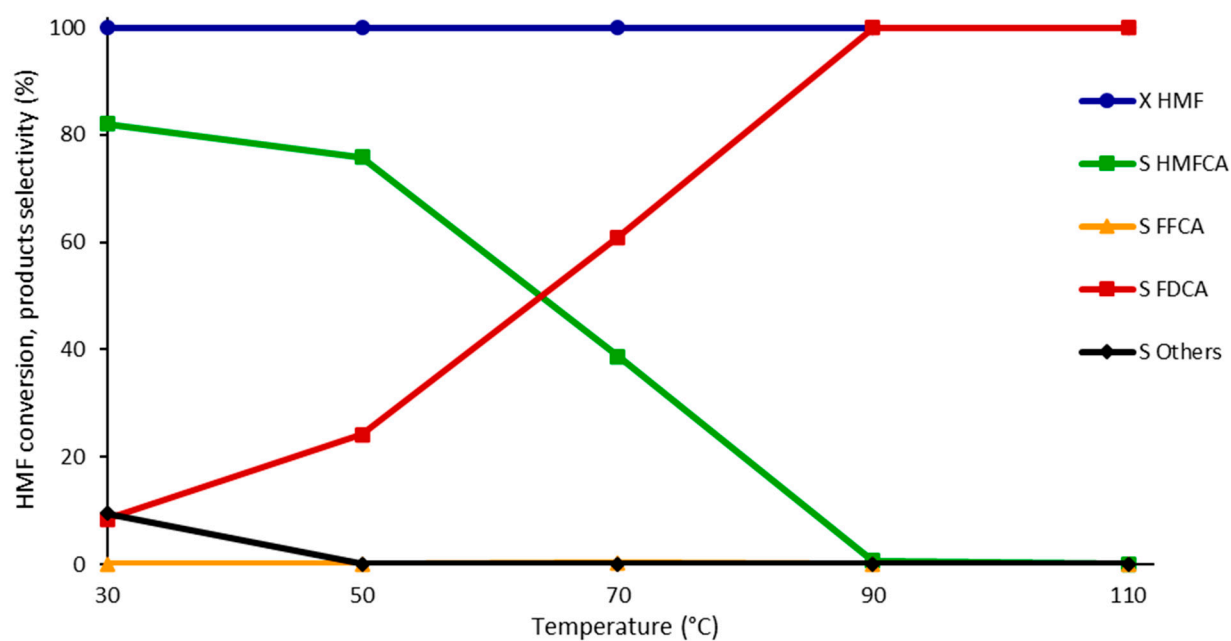

**Figure S24.** Study on the reaction temperature. Catalyst: Au/AC\_PVA\_0.6. Reaction conditions: 2 h, 10 bar O<sub>2</sub>, HMF:Met:NaOH=1:0.01:4.

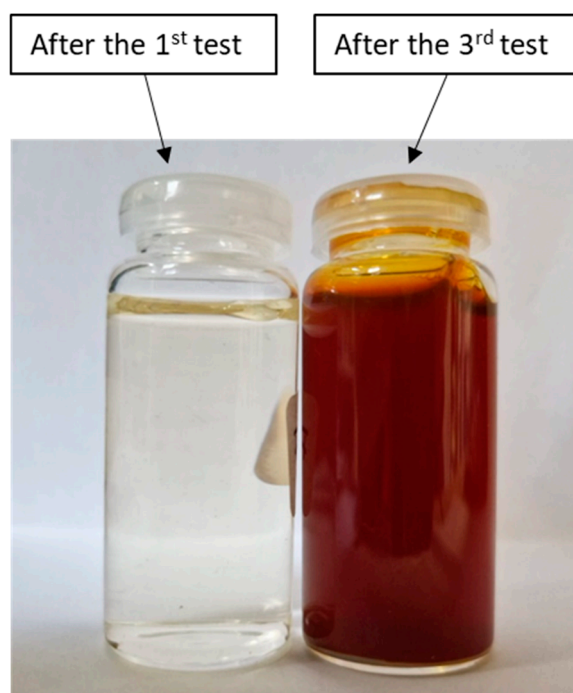

**Figure S25.** Comparison of reaction solution after the first test on Au/AC\_PVP\_0.6 and after the third test.

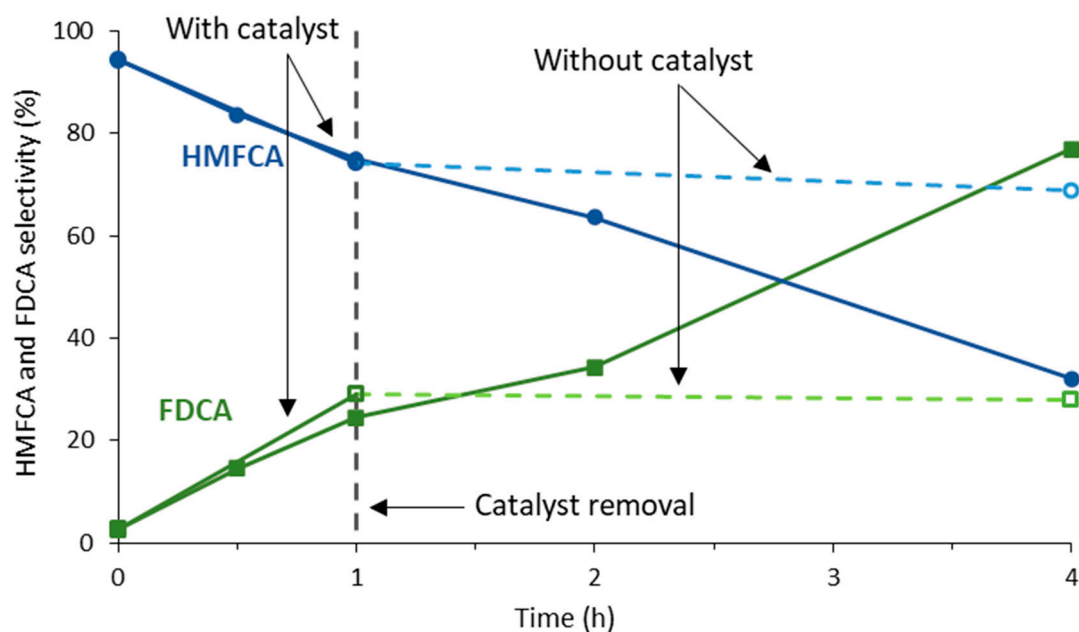

**Figure S26.** Leaching evaluation test. Solid lines and symbols represent the selectivity evolution during a regular catalytic test, as a reference. In the leaching test, represented by the open symbols, two steps are represented: The solid lines represent the first hour of reaction, in which the test was carried out normally; after 1h, the catalyst was removed and the liquid phase was maintained in the reaction conditions for 3 more hours, represented by the dashed lines. Reaction conditions: 4 h, 70 °C, 10 bar O<sub>2</sub>, HMF:Met:NaOH=1:0.01:4.

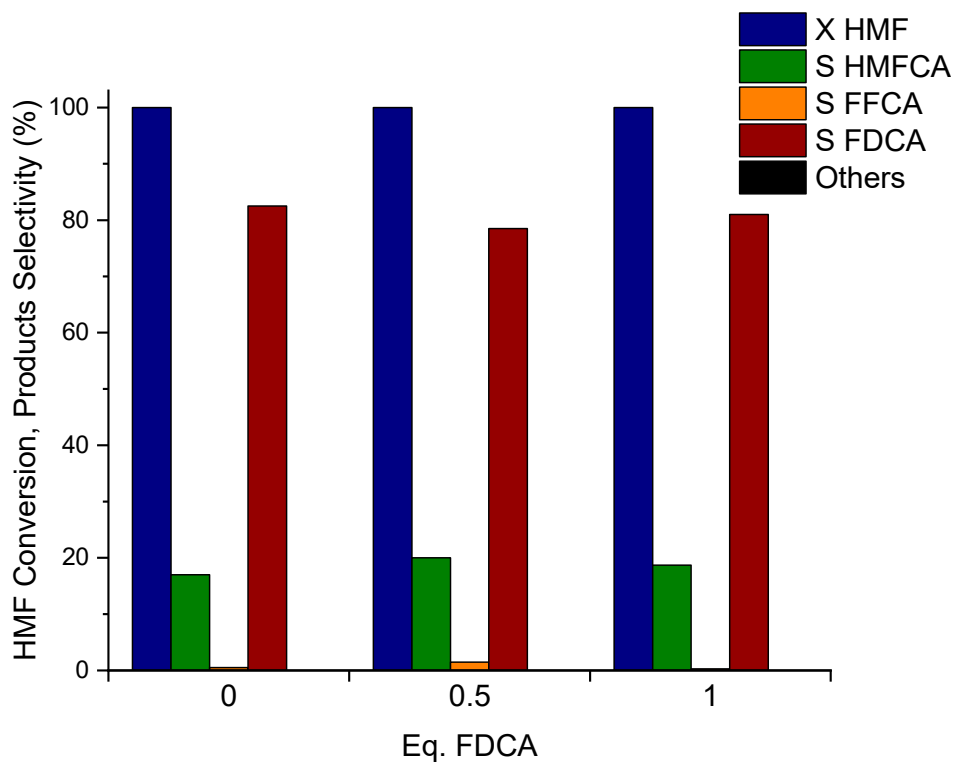

**Figure S267.** Effect of the FDCA in the starting reaction mixture. Reaction conditions: 4 h, 70 °C, 10 bar O<sub>2</sub>, HMF:Met:NaOH=1:0.01:4.

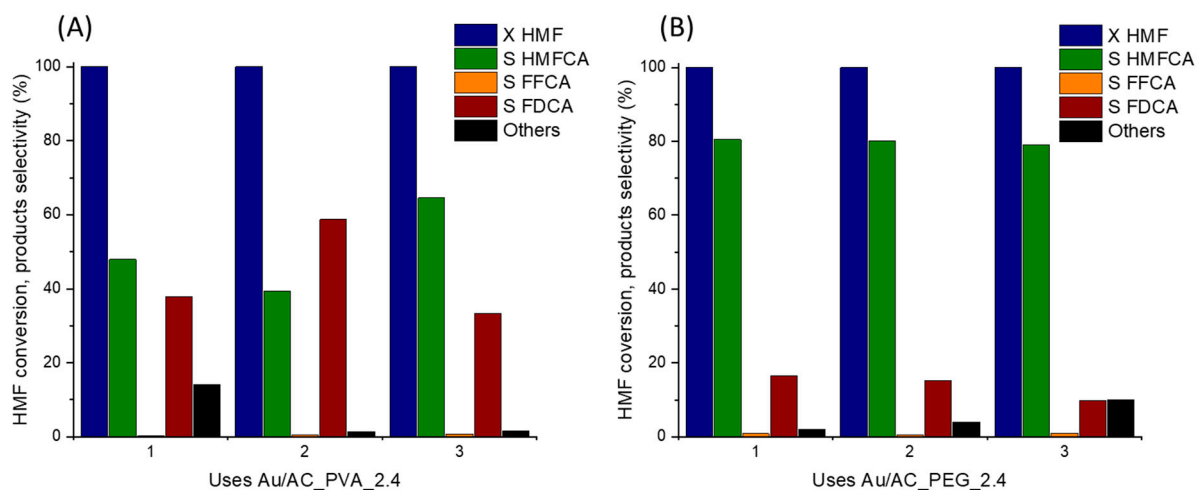

**Figure S28.** Reusability tests for the Au/AC\_PVA\_2.4 (A) and Au/AC\_PEG\_2.4 catalysts (B). Reaction conditions: 70°C, 2h, 10bar O<sub>2</sub>, HMF:Met:NaOH=1:0.01:4.
